# Supplementary material
Source: HighWire-hosted journal article supplement (https://bibliotheek.ehb.be/content/9/1/e002456)
Supplement: inline-supplementary-material-1 [file inline-supplementary-material-1.pdf]

1    **SUPPLEMENTARY INFORMATION 1**

| Condition          | n  | OR (95% CI)       |
|--------------------|----|-------------------|
| Cerebral palsy     | 43 | 1.35 (0.52-3.49)  |
| Neuromuscular      | 14 | 0.97 (0.73-1.28)  |
| Neurodevelopmental | 10 | 1.03 (0.74-1.44)  |
| Neurogenetic       | 9  | 0.87 (0.63-1.19)  |
| Spina bifida       | 1  | 1.29 (0.52-3.23)  |
| Tumour             | 1  | 1.29 (0.52- 2.23) |
| Other              | 6  | 0.78 (0.53-1.16)  |

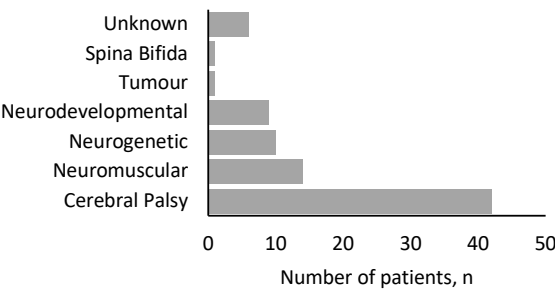

2  
3  
4  
5  
6  
7  
8  
9  
10

11 SUPPLEMENTARY INFORMATION 2

|                                                      |  |  |                                                                        |  |
|------------------------------------------------------|--|--|------------------------------------------------------------------------|--|
| Patient name, hospital number, age and date of birth |  |  | Diagnosis:                                                             |  |
| Named consultant                                     |  |  | Surgical risk: High / Medium / Low<br>Medical risk: High / Medium /Low |  |

|      |      |             |         |
|------|------|-------------|---------|
|      | Date | Reviewed by | Details |
| MRI  |      |             |         |
| PFTs |      |             |         |
| SC   |      |             |         |

|           |                |                 |
|-----------|----------------|-----------------|
| Next appt | Height/ Weight | Thrombosis risk |
|           |                |                 |

|                       |  |
|-----------------------|--|
| Procedure:            |  |
| MDT:                  |  |
| Plan:                 |  |
| Waiting list:         |  |
| Suitable theater:     |  |
| Post MDT appointment: |  |

- 12
- 13 MRI – magnetic resonance imaging
- 14 PFTs – pulmonary function tests
- 15 SC – social
- 16 Appt – appointment
- 17 MDT – multidisciplinary team

## BMJ Paediatrics Open

27 **SUPPLEMENTARY INFORMATION 3**

28

29 **Reasons for offering conservative management**

High surgical risk (high risk of not surviving anaesthetics)

Defer surgery until curve progression (and when more skeletally mature)

High medical risk (congenital heart defects)

High surgical risk (multiple organ abnormalities and low lying cord)

High medical risk (recurrent infections, home O2)

Extensive burns and unhealthy skin

Approaching end of life so risk of surgery outweighs benefits

Patient/family choice, minimal symptoms

High medical risk (non-invasive breathing)

High medical risk (tetralogy of fallot and severe pulmonary regurgitation)

Patient/family choice, good physical function

High surgical risk (sleep disordered breathing, hypoventilation)

Good mobility and minimal symptoms

Hip dislocation though to be cause of symptoms

Patient did not attend initial appointment

Stable interval scan

Symptoms improving without spinal surgery

30

31

32

33

34

35

## BMJ Paediatrics Open

## SUPPLEMENTARY INFORMATION 4

**Six to eight weeks**

- Outpatient appointment and check x-ray.
- Physiotherapy + hydrotherapy programme will commence (you will receive a letter soon after discharge from hospital with details.)

## Activity guidelines:

**Four weeks**

- Return to school/work part time (half days or every other day).

**Two to three months**

- Return to school full time.

**After three months**

- Increase time and distance, walking, increase pace as able.
- Aim to increase fitness.
- School, college or work full time.
- Can go swimming and cycling.
- Safe to fly on airlines.

**Six months**

- Aim to increase fitness.
- Cycling/dancing/jogging, increasing to running.
- Acceleration/deceleration and turning.
- No contact sports.

**10 to 12 months**

- Competitive contact sport.
- Skiing/trampolining.
- Roller coaster rides.
